# Supplementary material for: Programmed Ventricular Stimulation as an Additional Primary Prevention Risk Stratification Tool in Arrhythmogenic Right Ventricular Cardiomyopathy: A Multinational Study
Source: PubMed Central journal article supplement — Circulation. 2022 Oct 7;146(19):1434–43. doi: 10.1161/CIRCULATIONAHA.122.060866 (PMC9640278; doi:10.1161/circulationaha.122.060866), 2022-10-07
Supplement: cir-146-1434-s001.pdf [file cir-146-1434-s001.pdf]

## **Supplemental Material**

**Supplementary Tables**  
**Table S1**

| <b>Electrophysiological study data</b>    | <b>288 (100)</b> |
|-------------------------------------------|------------------|
| Number of stimulation sites (n=249)       | 222 (89.1%)      |
| Two sites, n (%)                          |                  |
| Number of extra-stimuli (n), median [IQR] | 16 (6.5%)        |
| Up to 2                                   | 215 (88.1%)      |
| Up to 3                                   | 13 (5.3%)        |
| Up to 4+                                  |                  |
| Shortest coupling (ms), median [IQR]      | 210 [200–230]    |
| Isoproterenol use, n (%)                  | 97 (33.7)        |
| High dose isoproterenol, n (%)            | 9 (3.1)          |
| PVS+ with isoproterenol, n (%)*           | 38 (39.2)        |
| Pts experiencing events, n (%)            | 22/38            |
| PVS- with isoproterenol, n (%)*           | 59 (60.8)        |
| Pts experiencing events, n (%)            | 8/59             |
| Inducible sustained monomorphic VT, n (%) | 137 (47.6)       |
| Overall number of VTs**, n                | 218              |
| LBBB, n (%)                               | 158 (72.5)       |
| Inferior Axis, n (%)                      | 48 (22.0)        |
| Superior Axis, n (%)                      | 73 (33.5)        |
| Unknown, n (%)                            | 37 (17.0)        |
| RBBB, n (%)                               | 13 (6.0)         |
| Polymorphic, n (%)                        | 18 (8.3)         |
| Cycle length available, n (%)             | 137 (62.8)       |
| Median cycle length (ms), median [IQR]    | 248 [220 – 280]  |
| Cycle length ≥300 ms                      | 7/137 (5.1)      |
| Cycle length 240 - 299 ms, n (%)          | 79/137 (57.6)    |
| Cycle length 200-239 ms, n (%)            | 38/137 (27.7)    |
| Cycle length <200 ms, n (%)               | 13/137 (9.5)     |
| AH interval, median [IQR]                 | 81 [65–100]      |
| HV interval, median [IQR]                 | 45 [40–52]       |
| Contextual VT Ablation, n (%)             | 26 (9.0)         |

\*Percentage calculated on the total of patients undergoing isoproterenol PVS

\*\*Details of VT morphology were not available in 29 cases

AH: atrial-to-His; HV: His-to-ventricle; LBBB: left bundle branch block; PVS: programmed ventricular stimulation;  
RBBB: right bundle branch block; VT: ventricular tachycardia;

**Table S2**

| <b>Predictors of sustained VT inducibility at PVS</b> |                  |                  |                  |              |
|-------------------------------------------------------|------------------|------------------|------------------|--------------|
|                                                       | OR [C.I.]        | p                | aOR [C.I.]       | p            |
| Age (per year increase)                               | 0.98 [0.97–1.00] | <b>0.038</b>     | 0.98 [0.97–1.00] | 0.073        |
| Male sex                                              | 1.36 [0.85–2.17] | 0.199            |                  |              |
| Caucasian ethnicity                                   | 0.68 [0.28–1.62] | 0.383            |                  |              |
| Proband status                                        | 2.11 [1.23–3.65] | <b>0.007</b>     | 1.44 [0.76–2.72] | 0.265        |
| Desmosomal variant carrier                            | 1.16 [0.70–1.93] | 0.566            |                  |              |
| Recent cardiac syncope                                | 1.49 [0.86–2.56] | 0.154            |                  |              |
| Total number of TWI (per unit increase)               | 1.19 [1.05–1.34] | <b>0.005</b>     | 1.13 [0.98–1.31] | 0.091        |
| NSVT at diagnosis                                     | 2.12 [1.32–3.39] | <b>0.002</b>     | 2.10 [1.23–3.56] | <b>0.006</b> |
| 24-h PVC count* (per log unit increase)               | 1.01 [0.96–1.25] | 0.166            |                  |              |
| RVEF (%) (per % increase)                             | 0.97 [0.95–0.99] | <b>0.029</b>     | 0.98 [0.96–1.01] | 0.123        |
| LVEF (%) (per % increase)                             | 1.00 [0.97–1.02] | 0.801            |                  |              |
| <b>ARVC Risk Score (%) (per % increase)</b>           | 0.65 [0.41–0.91] | <b>&lt;0.001</b> |                  |              |

aOR: adjusted odds ratio; LVEF: left ventricular ejection fraction; NSVT: non sustained ventricular tachycardia; OR: odds ratio; PVC: premature ventricular contraction; PVS: programmed ventricular stimulation; RVEF: right ventricular ejection fraction; TWI: T wave inversion; VT: ventricular tachycardia.

\*logarithmic relationship

**Table S3**

| <b>ICD programming available (n = 148 pts)</b> |                                     |                          |                          |          |
|------------------------------------------------|-------------------------------------|--------------------------|--------------------------|----------|
|                                                | <b>Overall Cohort<br/>(n = 148)</b> | <b>PVS+<br/>(n = 88)</b> | <b>PVS-<br/>(n = 60)</b> | <b>p</b> |
| <b>Monitor zone (ms), median [IQR]</b>         | 350 [330–375]                       | 333 [324–400]            | 351 [333–375]            | 0.419    |
| <b>VT Therapy zone (ms), median [IQR]</b>      | 307 [293–329]                       | 300 [292–330]            | 310 [300–322]            | 0.986    |

Abbreviations as per table S1

Supplementary figures

Figure S1: Distribution of predicted risks according to the ARVC risk calculator

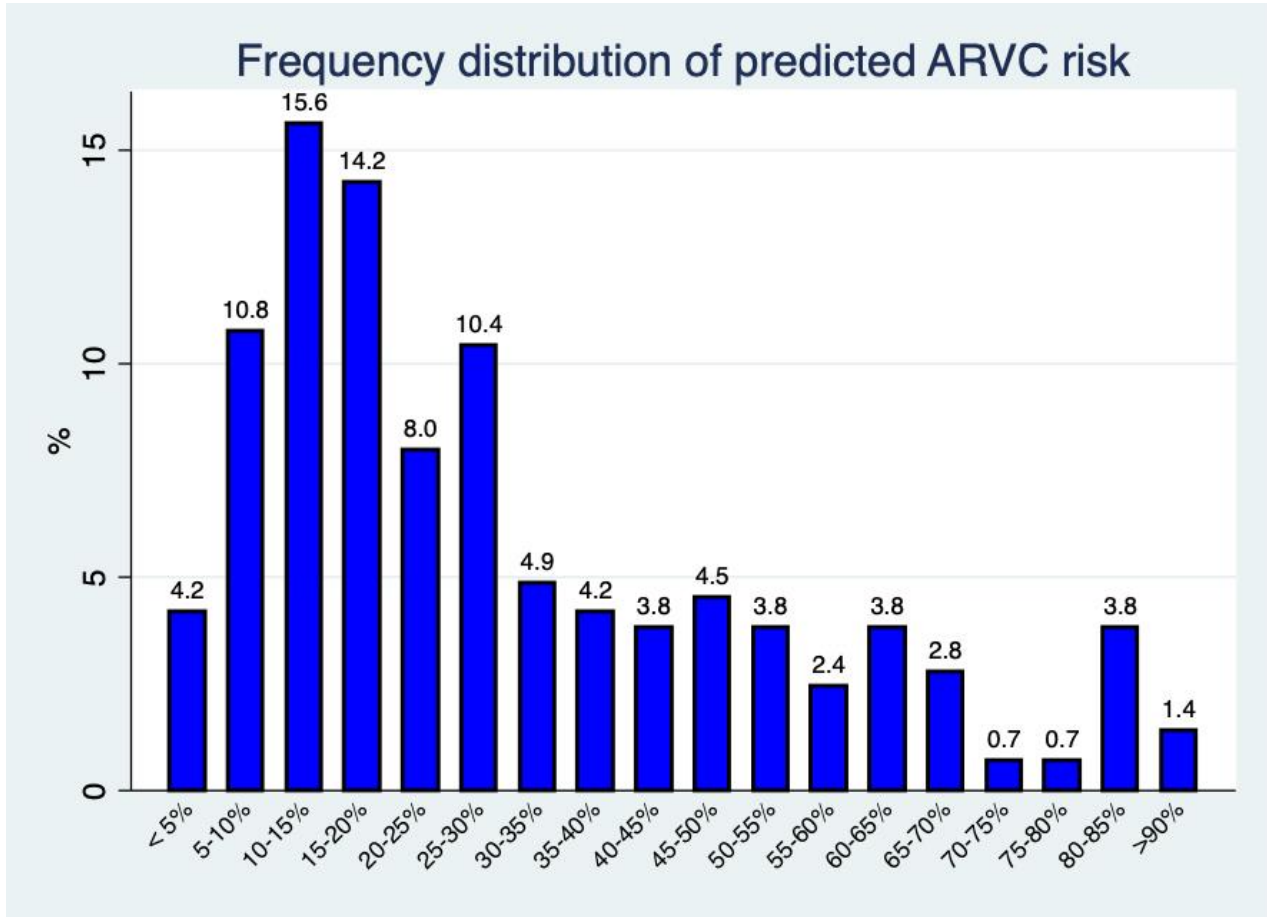

**Figure S2: ICD implantation flowchart**

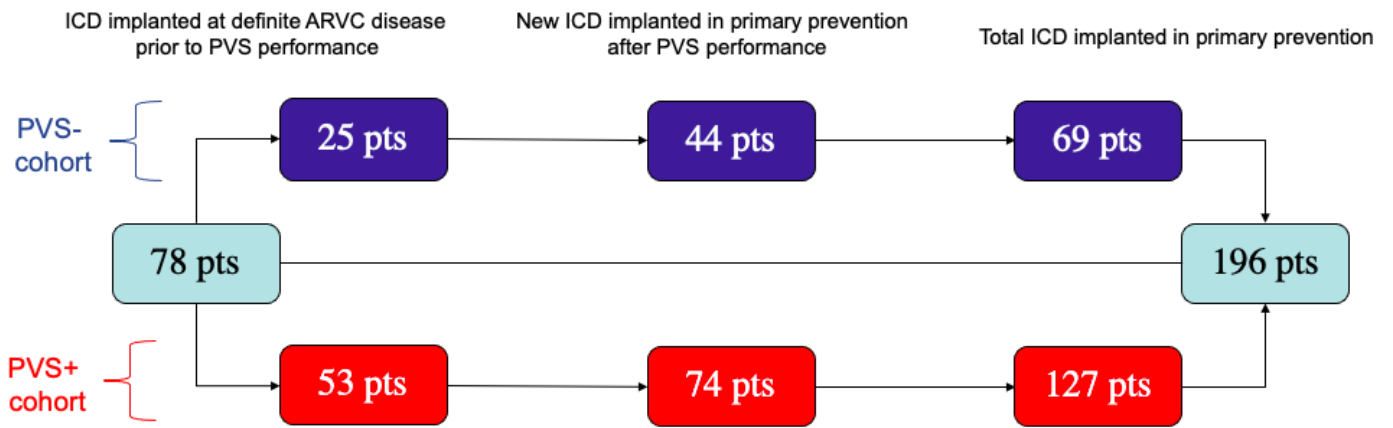

ICD: implantable cardioverter defibrillator, ARVC: arrhythmogenic right ventricular cardiomyopathy, PVS: programmed ventricular stimulation

Figure S3: Calibration plot illustrating the performance of the ARVC risk score for 5-year sustained VA prediction.

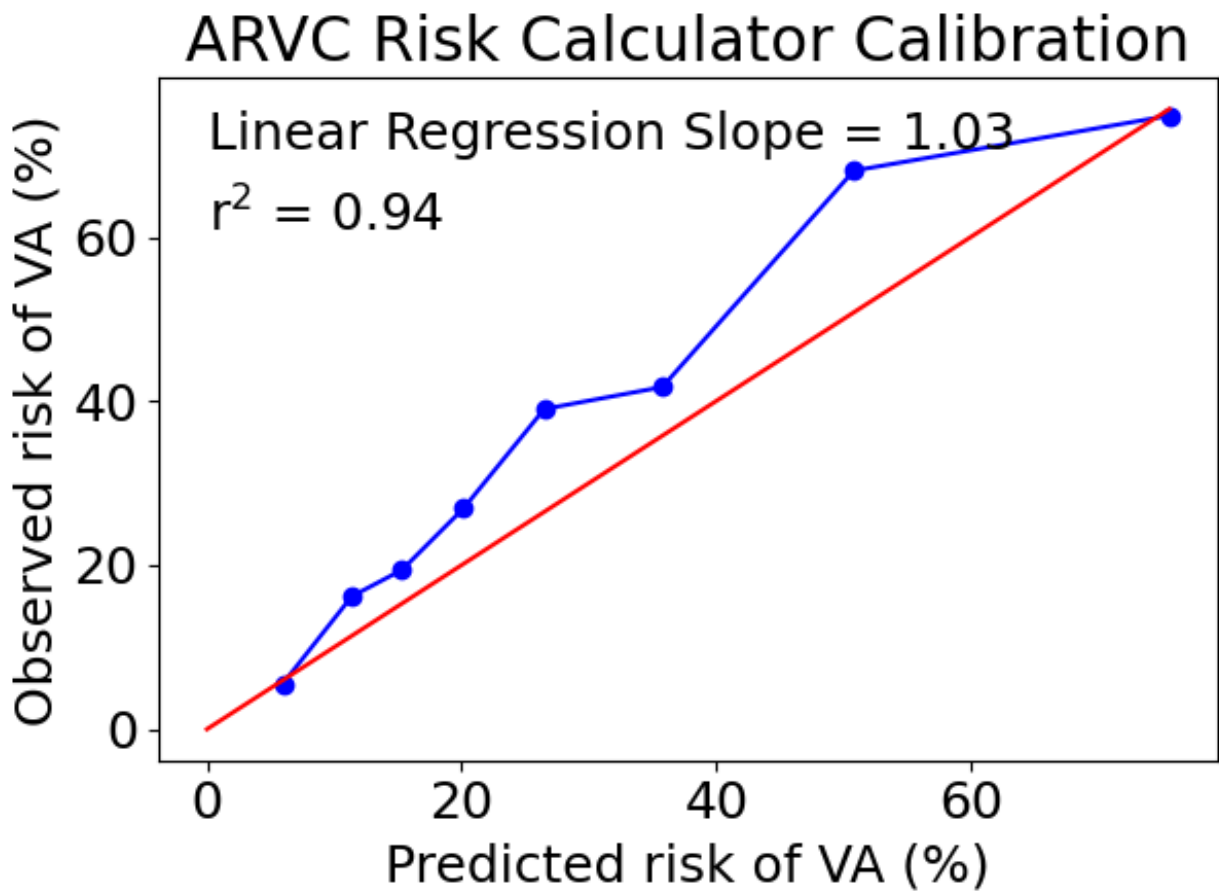

VA: ventricular arrhythmia





**Figure S4: Correlation between cycle length of PVS induced VT and spontaneous observed VT in the study cohort**

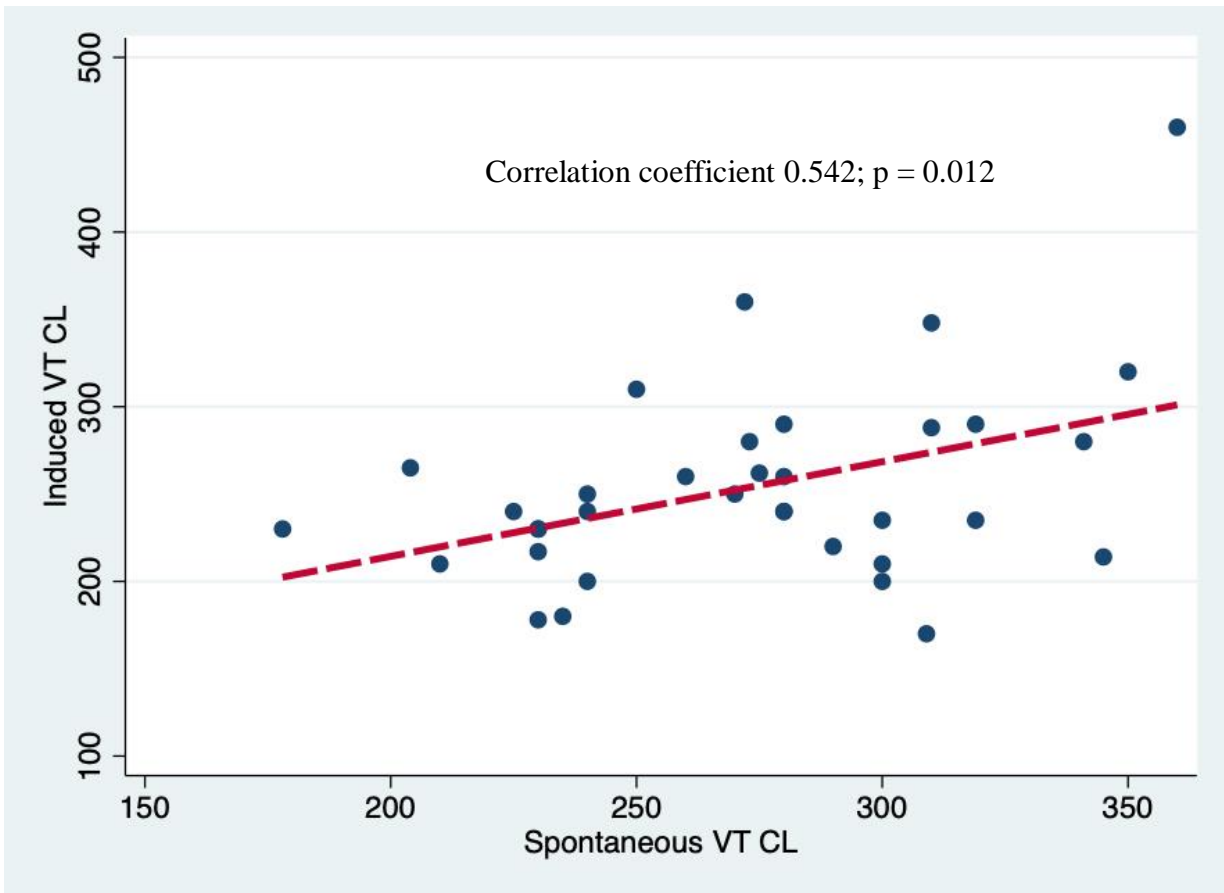

CL: cycle length, VT: ventricular tachycardia

## Section B – Complete Case Analysis

Population: n=227 pts; n=98 pts with PVS+

- Total cohort:
  - Sensitivity 76.6 [66.6 – 85.5];
  - Specificity 70.3 [63.2 – 77.5];
  - Positive predictive value 54.5 [44.6 – 64.3];
  - Negative predictive value 85.8 [79.8 – 91.8];
  - Positive likelihood ratio 2.58;
  - Negative likelihood ratio 0.33.
- A priori risk <25%:
  - Positive predictive value 45.8 [31.4 – 60.2];
  - Negative predictive value 92.9 [87.6 – 98.3];
  - Positive likelihood ratio 3.35;
  - Negative likelihood ratio 0.25.
- A priori risk  $\geq$ 25%:
  - Positive predictive value 62.4 [49.3 – 75.6];
  - Negative predictive value 70.6 [56.5 – 84.7];
  - Positive likelihood ratio 1.79;
  - Negative likelihood ratio 0.44.
- Association between ARVC calculator / PVS and outcomes
  - Concordance for ARVC calculator alone: 0.688
  - Concordance for PVS alone: 0.674
    - HR of PVS alone: 4.71 [2.69 – 8.25]; p < 0.001
  - Concordance for ARVC + PVS: 0.738
    - HR of PVS: 2.70 [1.54 – 4.73]; p < 0.001
  - LLR test for superiority of combined model: Test Statistic 7.369; p = 0.007

No significant differences in the overall results were observed between the complete-case and the complete cohort using multiple imputation by chained equation analyses.

## Section C –Patient characteristics by registry

| <b>Johns Hopkins Registry<br/>(n=108)</b> |                  |
|-------------------------------------------|------------------|
| Age, mean±s.d.                            | 35.2±12.8        |
| Male sex, n (%)                           | 50 (46.3)        |
| Caucasian, n (%)                          | 106 (98.1)       |
| Proband Status, n (%)                     | 74 (68.5)        |
| Recent cardiac syncope, n (%)             | 26 (24.1)        |
| Leads with TWI on ECG                     |                  |
| TWI in ≥3 precordial leads, n (%)         | 73 (67.6)        |
| TWI in ≥2 inferior leads, n (%)           | 25 (23.1)        |
| NSVT at diagnosis, n (%)                  | 57 (52.8)        |
| 24-h PVC count, median [IQR]              | 1647 [357–5160]  |
| Imaging at baseline                       |                  |
| RVEF (%), mean±s.d.                       | 40.6±11.6        |
| LVEF (%), mean±s.d.                       | 58.0±7.3         |
| Beta-blockers at baseline, n (%)          | 44 (40.7)        |
| <b>Events at follow up, n (%)</b>         | <b>52 (48.1)</b> |

LVEF: Left ventricular ejection fraction, NSVT: non-sustained ventricular tachycardia, PVC: premature ventricular complex, RVEF: right ventricular ejection fraction, TWI: T-wave inversion.

| <b>Italian Registry<br/>(n=87)</b> |                  |
|------------------------------------|------------------|
| Age, mean±s.d.                     | 47.8±13.3        |
| Male sex, n (%)                    | 66 (75.9)        |
| Caucasian, n (%)                   | 87 (100)         |
| Proband Status, n (%)              | 76 (87.4)        |
| Recent cardiac syncope, n (%)      | 25 (28.7)        |
| Leads with TWI on ECG              |                  |
| TWI in ≥3 precordial leads, n (%)  | 54 (62.1)        |
| TWI in ≥2 inferior leads, n (%)    | 25 (28.7)        |
| NSVT at diagnosis, n (%)           | 26 (29.9)        |
| 24-h PVC count, median [IQR]       | 1100 [500–2341]  |
| Imaging at baseline                |                  |
| RVEF (%), mean±s.d.                | 46.2±8.9         |
| LVEF (%), mean±s.d.                | 52.2±10.1        |
| Beta-blockers, n (%)               | 43 (49.4)        |
| <b>Events at follow up, n (%)</b>  | <b>36 (41.4)</b> |

| <b>Montreal site from the Canadian HIRO registry<br/>(n=8)</b> |                  |
|----------------------------------------------------------------|------------------|
| Age, mean±s.d.                                                 | 43.3±14.4        |
| Male sex, n (%)                                                | 4 (50.0)         |
| Caucasian, n (%)                                               | 2 (25.0)         |
| Proband Status, n (%)                                          | 6 (75.0)         |
| Recent cardiac syncope, n (%)                                  | 6 (75.0)         |
| Leads with TWI on ECG                                          |                  |
| TWI in ≥3 precordial leads, n (%)                              | 5 (62.5)         |
| TWI in ≥2 inferior leads, n (%)                                | 2 (25.0)         |
| NSVT at diagnosis, n (%)                                       | 5 (62.5)         |
| 24-h PVC count, median [IQR]                                   | 1623 [1445–3343] |
| Imaging at baseline                                            |                  |
| RVEF (%), mean±s.d.                                            | 35.0±17.7        |
| LVEF (%), mean±s.d.                                            | 52.6±8.0         |
| Beta-blockers, n (%)                                           | 2 (25.0)         |
| <b>Events at follow up, n (%)</b>                              | <b>6 (75.0)</b>  |

| <b>Dutch Registry<br/>(n=43)</b>  |                  |
|-----------------------------------|------------------|
| Age, mean±s.d.                    | 42.7±13.9        |
| Male sex, n (%)                   | 20 (46.5)        |
| Caucasian, n (%)                  | 42 (97.7)        |
| Proband Status, n (%)             | 22 (51.2)        |
| Recent cardiac syncope, n (%)     | 13 (30.2)        |
| Leads with TWI on ECG             |                  |
| TWI in ≥3 precordial leads, n (%) | 27 (62.8)        |
| TWI in ≥2 inferior leads, n (%)   | 14 (32.6)        |
| NSVT at diagnosis, n (%)          | 26 (60.5)        |
| 24-h PVC count, median [IQR]      | 2057 [975–4008]  |
| Imaging at baseline               |                  |
| RVEF (%), mean±s.d.               | 43.3±10.2        |
| LVEF (%), mean±s.d.               | 56.6±7.5         |
| Beta-blockers, n (%)              | 14 (32.6)        |
| <b>Events at follow up, n (%)</b> | <b>15 (34.9)</b> |

| <b>Swiss Registry</b><br>(n=27)   |                 |
|-----------------------------------|-----------------|
| Age, mean±s.d.                    | 39.7±14.5       |
| Male sex, n (%)                   | 14 (51.9)       |
| Caucasian, n (%)                  | 27 (100)        |
| Proband Status, n (%)             | 23 (85.2)       |
| Recent cardiac syncope, n (%)     | 8 (29.6)        |
| Leads with TWI on ECG             |                 |
| TWI in ≥3 precordial leads, n (%) | 21 (87.5)       |
| TWI in ≥2 inferior leads, n (%)   | 2 (7.4)         |
| NSVT at diagnosis, n (%)          | 14 (51.9)       |
| 24-h PVC count, median [IQR]      | 1005 [500–3386] |
| Imaging at baseline               |                 |
| RVEF (%), mean±s.d.               | 37.7±14.5       |
| LVEF (%), mean±s.d.               | 57.2±10.0       |
| Beta-blockers, n (%)              | 13 (48.1)       |
| <b>Events at follow up, n (%)</b> | <b>7 (25.9)</b> |

| <b>Nordic Registry (Norway and Sweden)</b><br>(n=15) |                  |
|------------------------------------------------------|------------------|
| Age, mean±s.d.                                       | 41.8±18.8        |
| Male sex, n (%)                                      | 7 (46.7)         |
| Caucasian, n (%)                                     | 14 (93.3)        |
| Proband Status, n (%)                                | 11 (73.3)        |
| Recent cardiac syncope, n (%)                        | 7 (46.7)         |
| Leads with TWI on ECG                                |                  |
| TWI in ≥3 precordial leads, n (%)                    | 9 (60.0)         |
| TWI in ≥2 inferior leads, n (%)                      | 3 (20.0)         |
| NSVT at diagnosis, n (%)                             | 7 (46.7)         |
| 24-h PVC count, median [IQR]                         | 1735 [109–10000] |
| Imaging at baseline                                  |                  |
| RVEF (%), mean±s.d.                                  | 40.3±13.9        |
| LVEF (%), mean±s.d.                                  | 53.9±10.2        |
| Beta-blockers, n (%)                                 | 7 (46.7)         |
| <b>Events at follow up, n (%)</b>                    | <b>4 (26.7)</b>  |
